# Supplementary material for: Serpin Family A Member 1 Is Prognostic and Involved in Immunological Regulation in Human Cancers
Source: MDPI journal article supplement (doi:10.3390/ijms241411566), 2023-07-17
Supplement: s1 [file s1]

Table S4 Relationship between SERPINA1 expression and clinical features in CHOL

| Characteristic            | SERPINA1 expression |           | P     |
|---------------------------|---------------------|-----------|-------|
|                           | Low                 | High      |       |
| Total                     | 18 (50)             | 18 (50)   |       |
| Gender                    |                     |           | 0.738 |
| Female                    | 11 (55)             | 9 (45)    |       |
| Male                      | 7 (43.8)            | 9 (56.2)  |       |
| Age                       |                     |           | 0.181 |
| ≤65                       | 6 (35.3)            | 11 (64.7) |       |
| >65                       | 12 (63.2)           | 7 (36.8)  |       |
| Race                      |                     |           | 1.000 |
| Asian                     | 1 (33.3)            | 2 (66.7)  |       |
| Black or African American | 1 (50)              | 1 (50)    |       |
| White                     | 16 (51.6)           | 15 (48.4) |       |
| BMI                       |                     |           | 1.000 |
| ≤25                       | 5 (50)              | 5 (50)    |       |
| >25                       | 12 (48)             | 13 (52)   |       |
| Histological type         |                     |           | 0.209 |
| distal                    | 2 (100)             | 0 (0)     |       |
| hilar/perihilar           | 3 (75)              | 1 (25)    |       |
| intrahepatic              | 13 (43.3)           | 17 (56.7) |       |
| Residual tumor            |                     |           | 0.656 |
| R0                        | 15 (53.6)           | 13 (46.4) |       |
| R1                        | 2 (40)              | 3 (60)    |       |
| Histologic grade          |                     |           | 0.862 |
| G1                        | 1 (100)             | 0 (0)     |       |
| G2                        | 8 (53.3)            | 7 (46.7)  |       |
| G3                        | 8 (44.4)            | 10 (55.6) |       |
| G4                        | 1 (50)              | 1 (50)    |       |
| CA19-9 level              |                     |           | 1.000 |
| Abnormal                  | 9 (56.2)            | 7 (43.8)  |       |
| normal                    | 7 (50)              | 7 (50)    |       |
| Child-Pugh grade          |                     |           | 0.486 |
| A                         | 10 (52.6)           | 9 (47.4)  |       |
| B                         | 2 (100)             | 0 (0)     |       |
| Vascular invasion         |                     |           | 0.164 |
| No                        | 17 (58.6)           | 12 (41.4) |       |
| Yes                       | 1 (20)              | 4 (80)    |       |
| Fibrosis ishak score      |                     |           | 0.359 |
| 0                         | 9 (56.2)            | 7 (43.8)  |       |
| 1/2                       | 6 (66.7)            | 3 (33.3)  |       |
| 3/4                       | 0 (0)               | 2 (100)   |       |
| Perineural invasion       |                     |           | 0.674 |

|                  |           |           |           |       |
|------------------|-----------|-----------|-----------|-------|
|                  | No        | 15 (57.7) | 11 (42.3) |       |
|                  | Yes       | 3 (42.9)  | 4 (57.1)  |       |
| T stage          |           |           |           | 0.812 |
|                  | T1        | 10 (52.6) | 9 (47.4)  |       |
|                  | T2        | 5 (41.7)  | 7 (58.3)  |       |
|                  | T3        | 3 (60)    | 2 (40)    |       |
| N stage          |           |           |           | 1.000 |
|                  | N0        | 14 (53.8) | 12 (46.2) |       |
|                  | N1        | 3 (60)    | 2 (40)    |       |
| M stage          |           |           |           | 1.000 |
|                  | M0        | 15 (53.6) | 13 (46.4) |       |
|                  | M1        | 3 (60)    | 2 (40)    |       |
| Pathologic stage |           |           |           | 0.657 |
|                  | Stage I   | 10 (52.6) | 9 (47.4)  |       |
|                  | Stage II  | 3 (33.3)  | 6 (66.7)  |       |
|                  | Stage III | 1 (100)   | 0 (0)     |       |
|                  | Stage IV  | 4 (57.1)  | 3 (42.9)  |       |

---
