# Supplementary material for: Serpin Family A Member 1 Is Prognostic and Involved in Immunological Regulation in Human Cancers
Source: MDPI journal article supplement (doi:10.3390/ijms241411566), 2023-07-17
Supplement: s1 [file s1]

Table S8 Relationship between SERPINA1 expression and clinical features in ESCA

| Characteristic            | SERPINA1 expression, n (%) |           | P                  |
|---------------------------|----------------------------|-----------|--------------------|
|                           | Low                        | High      |                    |
| Total                     | 81 (50)                    | 81 (50)   |                    |
| Gender                    |                            |           | 0.177              |
| Female                    | 15 (65.2)                  | 8 (34.8)  |                    |
| Male                      | 66 (47.5)                  | 73 (52.5) |                    |
| Age                       |                            |           | <b>0.005*</b>      |
| ≤60                       | 51 (61.4)                  | 32 (38.6) |                    |
| >60                       | 30 (38)                    | 49 (62)   |                    |
| Race                      |                            |           | <b>&lt; 0.001*</b> |
| Asian                     | 32 (84.2)                  | 6 (15.8)  |                    |
| Black or African American | 5 (83.3)                   | 1 (16.7)  |                    |
| White                     | 38 (38)                    | 62 (62)   |                    |
| Smoker                    |                            |           | 0.716              |
| No                        | 26 (55.3)                  | 21 (44.7) |                    |
| Yes                       | 49 (50.5)                  | 48 (49.5) |                    |
| Alcohol history           |                            |           | 0.822              |
| No                        | 22 (47.8)                  | 24 (52.2) |                    |
| Yes                       | 58 (51.3)                  | 55 (48.7) |                    |
| Barretts esophagus        |                            |           | <b>0.012*</b>      |
| No                        | 56 (52.8)                  | 50 (47.2) |                    |
| Yes                       | 6 (23.1)                   | 20 (76.9) |                    |
| Reflux history            |                            |           | <b>&lt; 0.001*</b> |
| No                        | 52 (61.9)                  | 32 (38.1) |                    |
| Yes                       | 16 (30.8)                  | 36 (69.2) |                    |
| Histological type         |                            |           | <b>&lt; 0.001*</b> |
| Adenocarcinoma            | 12 (15)                    | 68 (85)   |                    |
| Squamous Cell Carcinoma   | 69 (84.1)                  | 13 (15.9) |                    |
| Residual tumor            |                            |           | 0.675              |
| R0                        | 64 (52.9)                  | 57 (47.1) |                    |
| R1                        | 4 (36.4)                   | 7 (63.6)  |                    |
| R2                        | 1 (50)                     | 1 (50)    |                    |
| Histologic grade          |                            |           | <b>&lt; 0.001*</b> |
| G1                        | 15 (93.8)                  | 1 (6.2)   |                    |
| G2                        | 38 (57.6)                  | 28 (42.4) |                    |
| G3                        | 17 (38.6)                  | 27 (61.4) |                    |
| Tumor central location    |                            |           | <b>&lt; 0.001*</b> |
| Distal                    | 41 (36.3)                  | 72 (63.7) |                    |
| Mid                       | 34 (81)                    | 8 (19)    |                    |
| Proximal                  | 5 (83.3)                   | 1 (16.7)  |                    |
| Columnar metaplasia       |                            |           | <b>0.016*</b>      |

|                            |             |           |           |               |
|----------------------------|-------------|-----------|-----------|---------------|
|                            | No          | 38 (54.3) | 32 (45.7) |               |
|                            | Yes         | 7 (25)    | 21 (75)   |               |
| Columnnar mucosa dysplasia |             |           |           | 0.435         |
|                            | High grade  | 9 (36)    | 16 (64)   |               |
|                            | Low grade   | 1 (20)    | 4 (80)    |               |
|                            | Negative/no | 18 (47.4) | 20 (52.6) |               |
| T stage                    |             |           |           | <b>0.022*</b> |
|                            | T1          | 11 (40.7) | 16 (59.3) |               |
|                            | T2          | 27 (73)   | 10 (27)   |               |
|                            | T3          | 36 (46.8) | 41 (53.2) |               |
|                            | T4          | 2 (50)    | 2 (50)    |               |
| N stage                    |             |           |           | <b>0.015*</b> |
|                            | N0          | 43 (65.2) | 23 (34.8) |               |
|                            | N1          | 25 (39.7) | 38 (60.3) |               |
|                            | N2          | 6 (66.7)  | 3 (33.3)  |               |
|                            | N3          | 2 (33.3)  | 4 (66.7)  |               |
| M stage                    |             |           |           | 0.148         |
|                            | M0          | 66 (54.5) | 55 (45.5) |               |
|                            | M1          | 2 (25)    | 6 (75)    |               |
| Pathologic stage           |             |           |           | <b>0.033*</b> |
|                            | Stage I     | 9 (56.2)  | 7 (43.8)  |               |
|                            | Stage II    | 44 (63.8) | 25 (36.2) |               |
|                            | Stage III   | 20 (40.8) | 29 (59.2) |               |
|                            | Stage IV    | 2 (25)    | 6 (75)    |               |

---
