# Supplementary material for: Serpin Family A Member 1 Is Prognostic and Involved in Immunological Regulation in Human Cancers
Source: MDPI journal article supplement (doi:10.3390/ijms241411566), 2023-07-17
Supplement: s1 [file s1]

Table S3 Relationship between SERPINA1 expression and clinical features in STAD

| Characteristic                | SERPINA1 expression, n (%) |            | P             |
|-------------------------------|----------------------------|------------|---------------|
|                               | Low                        | High       |               |
| Total                         | 187 (49.9)                 | 188 (50.2) |               |
| Gender                        |                            |            | 0.564         |
| Female                        | 70 (52.2)                  | 64 (47.8)  |               |
| Male                          | 117 (48.5)                 | 124 (51.5) |               |
| Age                           |                            |            | 0.953         |
| ≤65                           | 83 (50.6)                  | 81 (49.4)  |               |
| >65                           | 103 (49.8)                 | 104 (50.2) |               |
| Race                          |                            |            | 0.119         |
| Asian                         | 43 (58.1)                  | 31 (41.9)  |               |
| Black or African American     | 3 (27.3)                   | 8 (72.7)   |               |
| White                         | 117 (49.2)                 | 121 (50.8) |               |
| Anatomic neoplasm subdivision |                            |            | <b>0.032*</b> |
| Antrum/Distal                 | 82 (59.4)                  | 56 (40.6)  |               |
| Cardia/Proximal               | 21 (43.8)                  | 27 (56.2)  |               |
| Fundus/Body                   | 54 (41.5)                  | 76 (58.5)  |               |
| Gastroesophageal Junction     | 22 (53.7)                  | 19 (46.3)  |               |
| Other                         | 3 (75)                     | 1 (25)     |               |
| Reflux history                |                            |            | 0.675         |
| No                            | 94 (53.7)                  | 81 (46.3)  |               |
| Yes                           | 23 (59)                    | 16 (41)    |               |
| Antireflux treatment          |                            |            | 0.789         |
| No                            | 67 (47.2)                  | 75 (52.8)  |               |
| Yes                           | 19 (51.4)                  | 18 (48.6)  |               |
| H pylori infection            |                            |            | 1.000         |
| No                            | 76 (52.4)                  | 69 (47.6)  |               |
| Yes                           | 9 (50)                     | 9 (50)     |               |
| Barretts esophagus            |                            |            | 0.491         |
| No                            | 104 (53.9)                 | 89 (46.1)  |               |
| Yes                           | 10 (66.7)                  | 5 (33.3)   |               |
| Histological type             |                            |            | 0.498         |
| Diffuse Type                  | 36 (57.1)                  | 27 (42.9)  |               |
| Mucinous Type                 | 8 (42.1)                   | 11 (57.9)  |               |
| Not Otherwise Specified       | 98 (47.3)                  | 109 (52.7) |               |
| Papillary Type                | 4 (80)                     | 1 (20)     |               |
| Signet Ring Type              | 5 (45.5)                   | 6 (54.5)   |               |
| Tubular Type                  | 36 (52.2)                  | 33 (47.8)  |               |
| Residual tumor                |                            |            | 0.574         |
| R0                            | 154 (51.7)                 | 144 (48.3) |               |

|                  |           |            |            |       |
|------------------|-----------|------------|------------|-------|
|                  | R1        | 6 (40)     | 9 (60)     |       |
|                  | R2        | 7 (43.8)   | 9 (56.2)   |       |
| Histologic grade |           |            |            | 0.072 |
|                  | G1        | 3 (30)     | 7 (70)     |       |
|                  | G2        | 59 (43.1)  | 78 (56.9)  |       |
|                  | G3        | 117 (53.4) | 102 (46.6) |       |
| T stage          |           |            |            | 0.325 |
|                  | T1        | 12 (63.2)  | 7 (36.8)   |       |
|                  | T2        | 34 (42.5)  | 46 (57.5)  |       |
|                  | T3        | 87 (51.8)  | 81 (48.2)  |       |
|                  | T4        | 52 (52)    | 48 (48)    |       |
| N stage          |           |            |            | 0.287 |
|                  | N0        | 58 (52.3)  | 53 (47.7)  |       |
|                  | N1        | 55 (56.7)  | 42 (43.3)  |       |
|                  | N2        | 32 (42.7)  | 43 (57.3)  |       |
|                  | N3        | 35 (47.3)  | 39 (52.7)  |       |
| M stage          |           |            |            | 0.988 |
|                  | M0        | 166 (50.3) | 164 (49.7) |       |
|                  | M1        | 12 (48)    | 13 (52)    |       |
| Pathologic stage |           |            |            | 0.560 |
|                  | Stage I   | 26 (49.1)  | 27 (50.9)  |       |
|                  | Stage II  | 62 (55.9)  | 49 (44.1)  |       |
|                  | Stage III | 71 (47.3)  | 79 (52.7)  |       |
|                  | Stage IV  | 18 (47.4)  | 20 (52.6)  |       |

---
