# Supplementary material for: Serpin Family A Member 1 Is Prognostic and Involved in Immunological Regulation in Human Cancers
Source: MDPI journal article supplement (doi:10.3390/ijms241411566), 2023-07-17
Supplement: s1 [file s1]

Table S5 Relationship between SERPINA1 expression and clinical features in COAD

| Characteristic            | SERPINA1 expression, n (%) |            | P             |
|---------------------------|----------------------------|------------|---------------|
|                           | Low                        | High       |               |
|                           | 239 (50)                   | 239 (50)   |               |
| Gender                    |                            |            | 0.927         |
| Female                    | 114 (50.4)                 | 112 (49.6) |               |
| Male                      | 125 (49.6)                 | 127 (50.4) |               |
| Age                       |                            |            | 0.926         |
| ≤65                       | 96 (49.5)                  | 98 (50.5)  |               |
| >65                       | 143 (50.4)                 | 141 (49.6) |               |
| Race                      |                            |            | 0.896         |
| Asian                     | 6 (54.5)                   | 5 (45.5)   |               |
| Black or African American | 37 (58.7)                  | 26 (41.3)  |               |
| White                     | 128 (55.2)                 | 104 (44.8) |               |
| BMI                       |                            |            | 0.300         |
| <25                       | 53 (60.9)                  | 34 (39.1)  |               |
| ≥25                       | 90 (53.3)                  | 79 (46.7)  |               |
| Residual tumor            |                            |            | 0.303         |
| R0                        | 162 (46.8)                 | 184 (53.2) |               |
| R1                        | 2 (50)                     | 2 (50)     |               |
| R2                        | 15 (62.5)                  | 9 (37.5)   |               |
| CEA level                 |                            |            | <b>0.044*</b> |
| ≤5                        | 94 (48)                    | 102 (52)   |               |
| >5                        | 65 (60.7)                  | 42 (39.3)  |               |
| Perineural invasion       |                            |            | 0.289         |
| NO                        | 68 (50.4)                  | 67 (49.6)  |               |
| YES                       | 28 (60.9)                  | 18 (39.1)  |               |
| Lymphatic invasion        |                            |            | 0.400         |
| NO                        | 127 (47.7)                 | 139 (52.3) |               |
| YES                       | 88 (52.4)                  | 80 (47.6)  |               |
| History of colon polyps   |                            |            | 0.059         |
| NO                        | 140 (53.4)                 | 122 (46.6) |               |
| YES                       | 63 (43.2)                  | 83 (56.8)  |               |
| Colon polyps present      |                            |            | 0.671         |
| NO                        | 89 (54.9)                  | 73 (45.1)  |               |
| YES                       | 51 (58.6)                  | 36 (41.4)  |               |
| T stage                   |                            |            | 0.167         |
| T1                        | 4 (36.4)                   | 7 (63.6)   |               |
| T2                        | 37 (44.6)                  | 46 (55.4)  |               |
| T3                        | 161 (49.8)                 | 162 (50.2) |               |
| T4                        | 37 (61.7)                  | 23 (38.3)  |               |
| N stage                   |                            |            | <b>0.033*</b> |
| N0                        | 130 (45.8)                 | 154 (54.2) |               |

|                  |           |            |            |               |
|------------------|-----------|------------|------------|---------------|
|                  | N1        | 56 (51.9)  | 52 (48.1)  |               |
|                  | N2        | 53 (61.6)  | 33 (38.4)  |               |
| M stage          |           |            |            | <b>0.017*</b> |
|                  | M0        | 163 (46.7) | 186 (53.3) |               |
|                  | M1        | 42 (63.6)  | 24 (36.4)  |               |
| Pathologic stage |           |            |            | <b>0.024*</b> |
|                  | Stage I   | 33 (40.7)  | 48 (59.3)  |               |
|                  | Stage II  | 86 (46)    | 101 (54)   |               |
|                  | Stage III | 71 (53.4)  | 62 (46.6)  |               |
|                  | Stage IV  | 42 (63.6)  | 24 (36.4)  |               |

---
