# Supplementary material for: Serpin Family A Member 1 Is Prognostic and Involved in Immunological Regulation in Human Cancers
Source: MDPI journal article supplement (doi:10.3390/ijms241411566), 2023-07-17
Supplement: s1 [file s1]

Table S6 Relationship between SERPINA1 expression and clinical features in READ

| Characteristic            | SERPINA1 expression, n (%) |           | P             |
|---------------------------|----------------------------|-----------|---------------|
|                           | Low                        | High      |               |
| Total                     | 83 (50)                    | 83 (50)   |               |
| Gender                    |                            |           | 0.533         |
| Female                    | 35 (46.7)                  | 40 (53.3) |               |
| Male                      | 48 (52.7)                  | 43 (47.3) |               |
| Age                       |                            |           | 0.877         |
| ≤65                       | 42 (51.2)                  | 40 (48.8) |               |
| >65                       | 41 (48.8)                  | 43 (51.2) |               |
| Race                      |                            |           | <b>0.018*</b> |
| Asian                     | 0 (0)                      | 1 (100)   |               |
| Black or African American | 6 (100)                    | 0 (0)     |               |
| White                     | 43 (53.1)                  | 38 (46.9) |               |
| BMI                       |                            |           | 0.224         |
| <25                       | 9 (45)                     | 11 (55)   |               |
| ≥25                       | 34 (64.2)                  | 19 (35.8) |               |
| Residual tumor            |                            |           | 0.561         |
| R0                        | 60 (49.2)                  | 62 (50.8) |               |
| R1                        | 2 (100)                    | 0 (0)     |               |
| R2                        | 6 (50)                     | 6 (50)    |               |
| CEA level                 |                            |           | 0.587         |
| ≤5                        | 30 (46.2)                  | 35 (53.8) |               |
| >5                        | 25 (53.2)                  | 22 (46.8) |               |
| Perineural invasion       |                            |           | 0.862         |
| NO                        | 23 (57.5)                  | 17 (42.5) |               |
| YES                       | 7 (50)                     | 7 (50)    |               |
| Lymphatic invasion        |                            |           | 0.757         |
| NO                        | 40 (47.6)                  | 44 (52.4) |               |
| YES                       | 33 (51.6)                  | 31 (48.4) |               |
| History of colon polyps   |                            |           | 0.065         |
| NO                        | 63 (54.8)                  | 52 (45.2) |               |
| YES                       | 11 (34.4)                  | 21 (65.6) |               |
| Colon polyps present      |                            |           | 0.925         |
| NO                        | 35 (56.5)                  | 27 (43.5) |               |
| YES                       | 6 (50)                     | 6 (50)    |               |
| T stage                   |                            |           | <b>0.015*</b> |
| T1+ T2                    | 12 (32.4)                  | 25 (67.6) |               |
| T3+ T4                    | 70 (55.1)                  | 57 (44.9) |               |
| N stage                   |                            |           | 0.069         |
| N0                        | 35 (41.7)                  | 49 (58.3) |               |
| N1                        | 25 (55.6)                  | 20 (44.4) |               |
| N2                        | 21 (63.6)                  | 12 (36.4) |               |

|                  |           |           |               |
|------------------|-----------|-----------|---------------|
| M stage          |           |           | 0.422         |
| M0               | 62 (49.2) | 64 (50.8) |               |
| M1               | 14 (60.9) | 9 (39.1)  |               |
| Pathologic stage |           |           | <b>0.024*</b> |
| Stage I+ II      | 34(36.7)  | 47 (63.3) |               |
| Stage III+ IV    | 45 (62.7) | 30 (37.3) |               |

---
