# Supplementary material for: Serpin Family A Member 1 Is Prognostic and Involved in Immunological Regulation in Human Cancers
Source: MDPI journal article supplement (doi:10.3390/ijms241411566), 2023-07-17
Supplement: s1 [file s1]

Table S2 Relationships between SERPINA1 expression and clinical features in LIHC

| Characteristic                       | SERPINA1 expression, n (%) |             | <i>P</i>      |
|--------------------------------------|----------------------------|-------------|---------------|
|                                      | Low                        | High        |               |
| Total                                | 187 (50.00)                | 187 (50.00) |               |
| Age                                  |                            |             | 0.380         |
| ≤60                                  | 84 (47.46)                 | 93 (52.54)  |               |
| >60                                  | 103 (52.55)                | 93 (47.45)  |               |
| Gender                               |                            |             | 0.825         |
| Female                               | 59 (48.76)                 | 62 (51.24)  |               |
| Male                                 | 128 (50.59)                | 125 (49.40) |               |
| Weight (kg)                          |                            |             | 0.914         |
| ≤70                                  | 93 (50.54)                 | 91 (49.46)  |               |
| >70                                  | 80 (49.38)                 | 82 (50.62)  |               |
| BMI (kg/m <sup>2</sup> )             |                            |             | 0.954         |
| ≤25                                  | 88 (49.72)                 | 89 (50.28)  |               |
| >25                                  | 81 (50.63)                 | 79 (49.37)  |               |
| Adjacent hepatic tissue inflammation |                            |             | <b>0.003*</b> |
| None                                 | 70 (59.32)                 | 48 (40.68)  |               |
| Mild                                 | 44 (43.56)                 | 57 (56.43)  |               |
| Severe                               | 4 (22.22)                  | 14 (77.78)  |               |
| Histologic grade                     |                            |             | 0.236         |
| G1                                   | 34 (61.82)                 | 21 (38.18)  |               |
| G2                                   | 83 (46.63)                 | 95 (53.37)  |               |
| G3                                   | 61 (49.19)                 | 63 (50.81)  |               |
| G4                                   | 7 (58.33)                  | 5 (41.67)   |               |
| Residual tumor                       |                            |             | 0.621         |
| R0                                   | 163 (49.85)                | 164 (50.15) |               |
| R1                                   | 7 (41.18)                  | 10 (58.82)  |               |
| R2                                   | 0 (0.0)                    | 1 (100.00)  |               |
| Child-Pugh grade                     |                            |             | 0.905         |
| A                                    | 105 (47.95)                | 114 (52.05) |               |
| B                                    | 9 (42.86)                  | 12 (57.14)  |               |
| C                                    | 0 (0.0)                    | 1 (10.00)   |               |
| T stage                              |                            |             | <b>0.027*</b> |
| T1                                   | 79 (43.17)                 | 104 (56.83) |               |
| T2                                   | 57 (60.00)                 | 38 (40.00)  |               |
| T3                                   | 45 (56.25)                 | 35 (43.75)  |               |
| T4                                   | 5 (38.46)                  | 8 (61.54)   |               |
| N stage                              |                            |             | 1.000         |
| N0                                   | 122 (48.03)                | 132 (51.97) |               |
| N1                                   | 2 (50.00)                  | 2 (50.00)   |               |
| M stage                              |                            |             | 0.123         |
| M0                                   | 132 (49.25)                | 136 (50.75) |               |

|                   |             |             |               |
|-------------------|-------------|-------------|---------------|
| M1                | 0 (0.00)    | 4 (100.00)  |               |
| Pathologic stage  |             |             | <b>0.009*</b> |
| Stage I           | 76 (43.93)  | 97 (56.07)  |               |
| Stage II          | 51 (58.62)  | 36 (41.38)  |               |
| Stage III         | 47 (55.29)  | 38 (44.71)  |               |
| Stage IV          | 0 (0.00)    | 5 (100.00)  |               |
| Vascular invasion |             |             | 0.249         |
| No                | 96 (46.15)  | 112 (53.85) |               |
| Yes               | 59 (53.64)  | 51 (46.36)  |               |
| AFP (ng/ml)       |             |             | <b>0.019*</b> |
| ≤400              | 114 (53.02) | 101 (46.98) |               |
| >400              | 23 (35.38)  | 42 (64.62)  |               |
| Albumin (g/dl)    |             |             | 0.472         |
| <3.5              | 30 (43.48)  | 39 (56.52)  |               |
| ≥3.5              | 114 (49.35) | 117 (50.65) |               |
| Prothrombin time  |             |             | 1.000         |
| ≤4                | 100 (48.08) | 108 (51.92) |               |
| >4                | 43 (48.31)  | 46 (51.69)  |               |

---
