# Supplementary material for: Serpin Family A Member 1 Is Prognostic and Involved in Immunological Regulation in Human Cancers
Source: MDPI journal article supplement (doi:10.3390/ijms241411566), 2023-07-17
Supplement: s1 [file s1]

Table S7 Relationship between SERPINA1 expression and clinical features in PAAD

| Characteristic                  | SERPINA1 expression, n (%) |           | P     |
|---------------------------------|----------------------------|-----------|-------|
|                                 | Low                        | High      |       |
|                                 | 89 (50)                    | 89 (50)   |       |
| Gender                          |                            |           | 0.651 |
| Female                          | 38 (47.5)                  | 42 (52.5) |       |
| Male                            | 51 (52)                    | 47 (48)   |       |
| Age                             |                            |           | 0.548 |
| ≤65                             | 44 (47.3)                  | 49 (52.7) |       |
| >65                             | 45 (52.9)                  | 40 (47.1) |       |
| Race                            |                            |           | 0.490 |
| Asian                           | 7 (63.6)                   | 4 (36.4)  |       |
| Black or African American       | 2 (33.3)                   | 4 (66.7)  |       |
| White                           | 77 (49)                    | 80 (51)   |       |
| Residual tumor                  |                            |           | 0.293 |
| R0                              | 54 (50.5)                  | 53 (49.5) |       |
| R1                              | 23 (44.2)                  | 29 (55.8) |       |
| R2                              | 4 (80)                     | 1 (20)    |       |
| Histologic grade                |                            |           | 0.175 |
| G1                              | 11 (35.5)                  | 20 (64.5) |       |
| G2                              | 50 (52.6)                  | 45 (47.4) |       |
| G3                              | 25 (52.1)                  | 23 (47.9) |       |
| G4                              | 2 (100)                    | 0 (0)     |       |
| Anatomic neoplasm subdivision   |                            |           | 0.857 |
| Head of Pancreas                | 70 (50.7)                  | 68 (49.3) |       |
| Other                           | 19 (47.5)                  | 21 (52.5) |       |
| Smoker                          |                            |           | 0.235 |
| No                              | 37 (56.9)                  | 28 (43.1) |       |
| Yes                             | 36 (45.6)                  | 43 (54.4) |       |
| Alcohol history                 |                            |           | 0.609 |
| No                              | 30 (46.2)                  | 35 (53.8) |       |
| Yes                             | 52 (51.5)                  | 49 (48.5) |       |
| History of diabetes             |                            |           | 0.398 |
| No                              | 52 (48.1)                  | 56 (51.9) |       |
| Yes                             | 22 (57.9)                  | 16 (42.1) |       |
| History of chronic pancreatitis |                            |           | 0.936 |
| No                              | 66 (51.6)                  | 62 (48.4) |       |
| Yes                             | 6 (46.2)                   | 7 (53.8)  |       |
| Family history of cancer        |                            |           | 0.098 |
| No                              | 27 (57.4)                  | 20 (42.6) |       |

|                  |           |           |           |       |
|------------------|-----------|-----------|-----------|-------|
|                  | Yes       | 25 (39.7) | 38 (60.3) |       |
| T stage          |           |           |           | 1.000 |
|                  | T1        | 4 (57.1)  | 3 (42.9)  |       |
|                  | T2        | 12 (50)   | 12 (50)   |       |
|                  | T3        | 71 (50)   | 71 (50)   |       |
|                  | T4        | 2 (66.7)  | 1 (33.3)  |       |
| N stage          |           |           |           | 0.581 |
|                  | N0        | 27 (54)   | 23 (46)   |       |
|                  | N1        | 59 (48)   | 64 (52)   |       |
| M stage          |           |           |           | 1.000 |
|                  | M0        | 40 (50.6) | 39 (49.4) |       |
|                  | M1        | 3 (60)    | 2 (40)    |       |
| Pathologic stage |           |           |           | 0.935 |
|                  | Stage I   | 11 (52.4) | 10 (47.6) |       |
|                  | Stage II  | 72 (49.3) | 74 (50.7) |       |
|                  | Stage III | 2 (66.7)  | 1 (33.3)  |       |
|                  | Stage IV  | 3 (60)    | 2 (40)    |       |

---
